# Supplementary material
Source: PubMed Central journal article supplement (PMC4442534)
Supplement: JVI.00064-15_zjv999090348so1.pdf [file JVI.00064-15_zjv999090348so1.pdf]

Supplemental Fig 1. Genome coverage of the multiple segments of D/influenza togetherwith % nucleotide identity to strain swine/Oklahoma/1334/2011

Supplemental Table 1. Primers used for real time PCR assays

# Suppl Fig. 1

## Segment 1 (PB2)

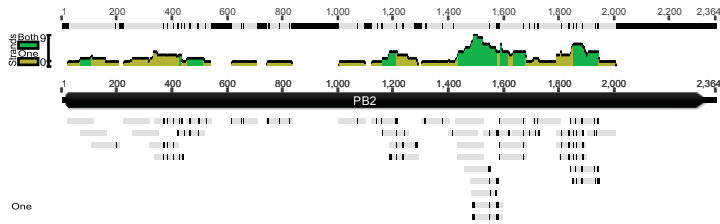

## Segment 2 (PB1)

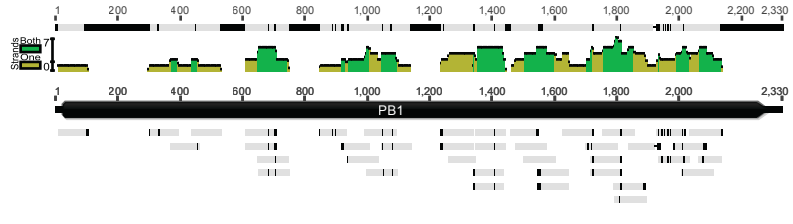

## Segment 3 (P3)

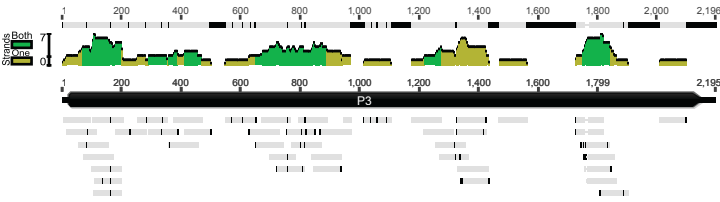

## Segment 4 (HEF)

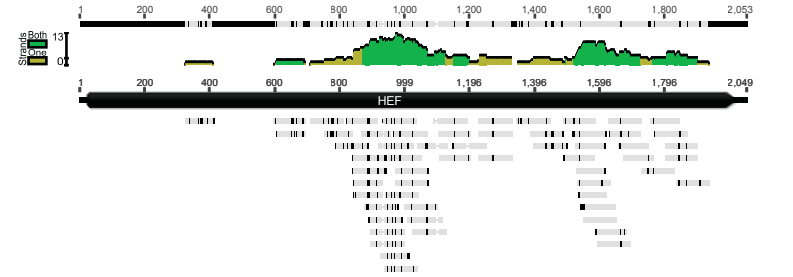

## Segment 5 (NP)

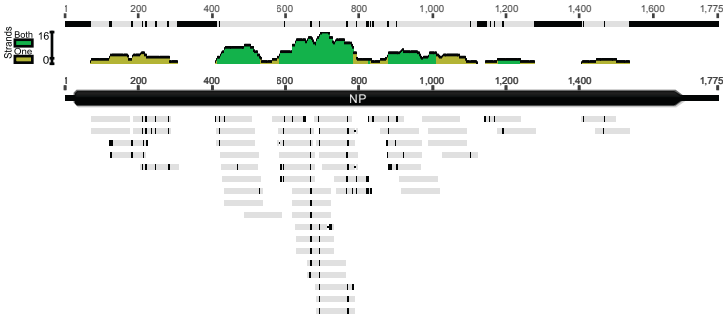

## Segment 6 (P42)

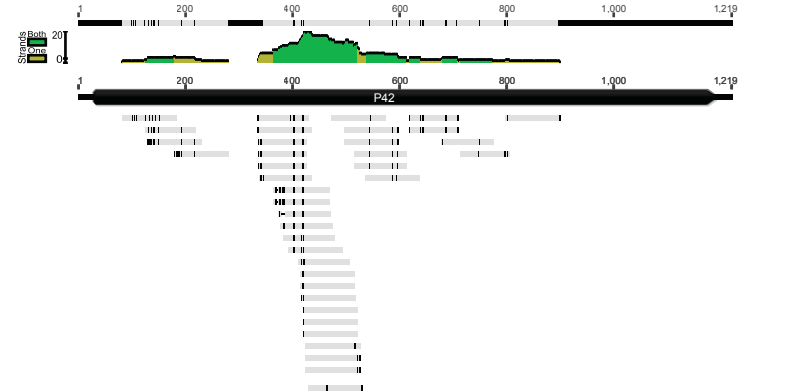

## Segment 7 (NS1/2)

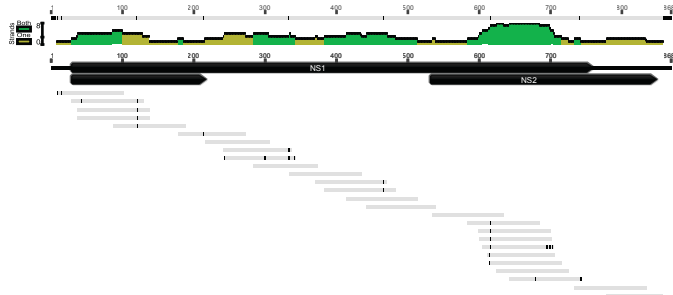

| Segment   | Viral hits | Coverage | Average % nucleotide identity |
|-----------|------------|----------|-------------------------------|
| 1 (PB2)   | 40         | 73%      | 96.56%                        |
| 2 (PB1)   | 40         | 63%      | 97.27%                        |
| 3 (P3)    | 45         | 74%      | 98.27%                        |
| 4 (HEF)   | 60         | 65%      | 94.85%                        |
| 5 (NP)    | 55         | 68%      | 97.20%                        |
| 6 (P42)   | 38         | 61%      | 95.40%                        |
| 7 (NS1/2) | 26         | 99%      | 98.80%                        |

Suppl. Table 1

| <u>Virus</u>                         | <u>Forward primer</u>         | <u>Tagman probe</u>                       | <u>Reverse primer</u>       | <u>Amplicon length</u> | <u>Region of amplification</u> |
|--------------------------------------|-------------------------------|-------------------------------------------|-----------------------------|------------------------|--------------------------------|
| <b>Bovine Adenovirus 3</b>           | 5'-CCTAGGAGTGGTCCTTTAGAAAG-3' | 5'-/56FAM/TCTGGGCAA/ZEN/TGATCTGCG-3'      | 5'-GTAGAGGTTGACGCTGGTAAT-3' | 115 bp                 | Hexon                          |
| <b>Bovine Rhinitis A - BSRI4</b>     | 5'-TGGACCCAACCAAGATTG-3'      | 5'-/56FAM/TCAACAGGT/ZEN/AGCACATCA-3'      | 5'-TGGATCGGGAGAAAATTAGG-3'  | 84 bp                  | 3D                             |
| <b>Bovine Rhinitis B - BSRI1</b>     | 5'-GCGATTGTCCTAGGGTTT-3'      | 5'-/56FAM/TTTGACGCG/ZEN/TGGCACACT-3'      | 5'-GCCACTGAGGTTAGCTTCTC-3'  | 109 bp                 | 3D                             |
| <b>Bovine Rhinitis B - BSRI2</b>     | 5'-AACGCGATTGTGTTCTAGGG-3'    | 5'-/56FAM/TTGGAGGCTATCTG/ZEN/TCCTTTGCA-3' | 5'-GAGACCCGCTACTGAGGTTA-3'  | 120 bp                 | 3D                             |
| <b>Bovine Influenza D/CA</b>         | 5'-GGCAAACCTATGACTGGACAAG-3'  | 5'-/56FAM/ACTGTTAGCTGAAG/ZEN/AGCGGTGGC-3' | 5'-TCCCTGTGTTTCTGTATAGCG-3' | 89 bp                  | PB1                            |
| <b>Bovine Astrovirus - BSRI1</b>     | 5'-GTTGGGCTCCTTATCGAAG-3'     | 5'-/56FAM/CGGTGATG/ZEN/CTGTTGAAC-3'       | 5'-CACTATTGGCGAATGCTTGG-3'  | 134 bp                 | ORF1b                          |
| <b>Bovine Parvovirus 2 - BSRI</b>    | 5'-AGGCTACACCCTGTAGTT-3'      | 5'-/56FAM/AGGACGCGAGGAG/ZEN/CATTATGGT-3'  | 5'-GTTCCATAGCTAGCCATAA-3'   | 135 bp                 | NS2                            |
| <b>Bovine Picobirnavirus - BSRI1</b> | 5'-GTTCCACCTGAGCGATACC-3'     | 5'-/56FAM/CCGACCTGTGGAACA/ZENACGAATGGA-3' | 5'-GGGTGGCGATTACAATTTCT-3'  | 96 bp                  | RDRP                           |
